# Supplementary material
Source: Research Square preprint supplement (doi:10.21203/rs.3.rs-9347158/v1)
Supplement: Supplementary file 1 [file a78b45d161d677c5ddc5ca47.docx]

**Supplementary material**

**Supplementary table 1.**

| **PRIMARY score** | **Frequency** | **BCR events** | **RR events** |
| --- | --- | --- | --- |
| **1** | 16 (10.81%) | 3 | 3 |
| **2A** | 7 (4.73%) | 0 | 0 |
| **2B** | 7 (4.73%) | 1 | 0 |
| **3** | 13 (8.78%) | 2 | 0 |
| **4** | 61 (41.22%) | 13 | 5 |
| **5** | 44 (29.73%) | 11 | 7 |

| **Supplementary table 2.** PSMA PET/CT imaging findings stratified by risk group. | | | | |
| --- | --- | --- | --- | --- |
|  | **Risk groups** | | | |
|  | **Favorable (FIR)** | **Unfavorable (UIR)** | **Total Test** |  |
| **Numbers** | 71 (48.0%) | 77 (52.0%) | 148 (100.0%) |  |
| **PET positivity** |  |  |  |  |
| **Negative** | 67 (94.4%) | 60 (77.9%) | 127 (85.8%) 0.007 |  |
| **Positive** | 4 (5.6%) | 16 (20.8%) | 20 (13.5%) |  |
| **PET N+** |  |  |  |  |
| **N0 (Negative)** | 71 (100.0%) | 66 (85.7%) | 137 (92.6%) |  |
| **N+ (Positive)** | 0 (0.0%) | 11 (14.3%) | 11 (7.4%) |  |
| **PET M+** |  |  |  |  |
| **M0 (Negative)** | 67 (94.4%) | 66 (85.7%) | 133 (89.9%) |  |
| **M+ (Positive)** | 4 (5.6%) | 11 (14.3%) | 15 (10.1%) |  |
| **Focality PET** |  |  |  |  |
| **Plurifocal** | 25 (35.2%) | 21 (27.3%) | 46 (31.1%) 0.297 |  |
| **Monofocal** | 46 (64.8%) | 56 (72.7%) | 102 (68.9%) |  |
| **PET tracers** |  |  |  |  |
| **18F-PSMA** | 46 (64.8%) | 42 (54.5%) | 88 (59.5%) |  |
| **68Ga-PSMA** | 25 (35.2%) | 35 (45.5%) | 60 (40.5%) |  |

**Supplementary table 3.** Incidence of BCR and RR rates according to PSMA PET/CT nodal and metastatic status.

| **Category** | **n.** | **BCR** | **%** | **RR** | **%** |
| --- | --- | --- | --- | --- | --- |
| N0M0 | 128 | 25 (12 UIR, 13 FIR) | 19.53125 | 12 (6 UIR, 6 FIR) | 9.4 |
| N+M0 | 5 | 0 | 0 | 0 | 0 |
| NxM+ | 15 | 5 (5 UIR) | 33.33333 | 3 (3 UIR) | 20 |

NxM+= metastatic disease, independently from the nodal status.

**Supplementary Figure 1.** Kaplan-Meier curves for RR-free survival: Comparison between PRIMARY score 4 and PRIMARY score 5 subgroups.

**Supplementary figure 2**. Kaplan-Meier curves for BCR-free survival and RR-free survival stratified by primary treatment modality (Radical Prostatectomy vs. Radiotherapy ± ADT).
